# Supplementary material for: Has the Risk of Outpatient Visits for Allergic Rhinitis, Related to Short-Term Exposure to Air Pollution, Changed over the Past Years in Beijing, China?
Source: MDPI journal article supplement (doi:10.3390/ijerph191912529), 2022-10-01
Supplement: s1 [file s1]

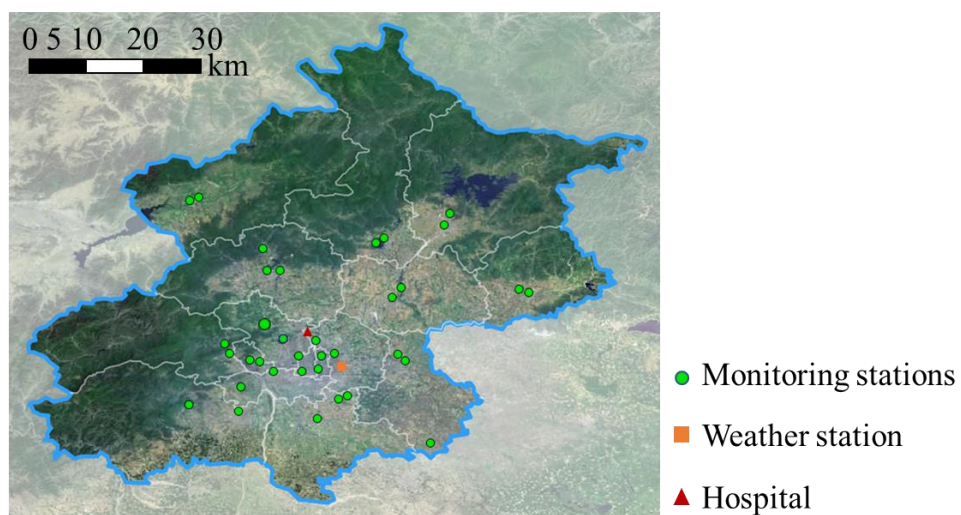

Figure S1 Spatial distribution of environmental monitoring stations, weather station and the hospital in Beijing.

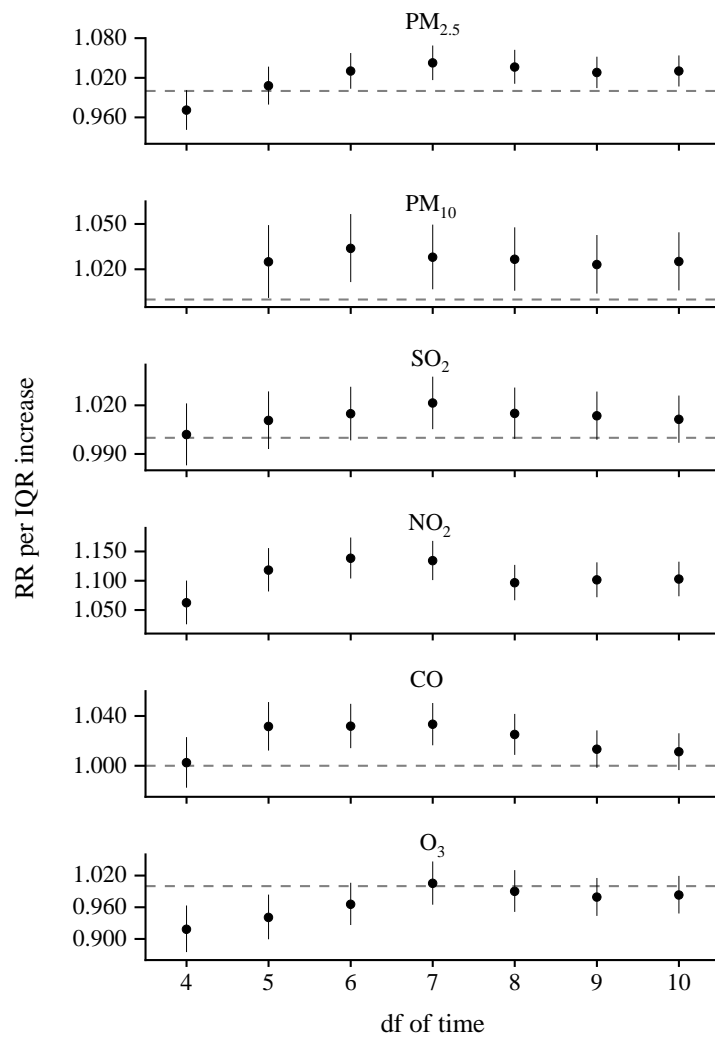

Figure S2 Relative risks (RRs) of outpatient visits for AR associated with an IQR increase in the air pollutants using different degree of freedom per year.

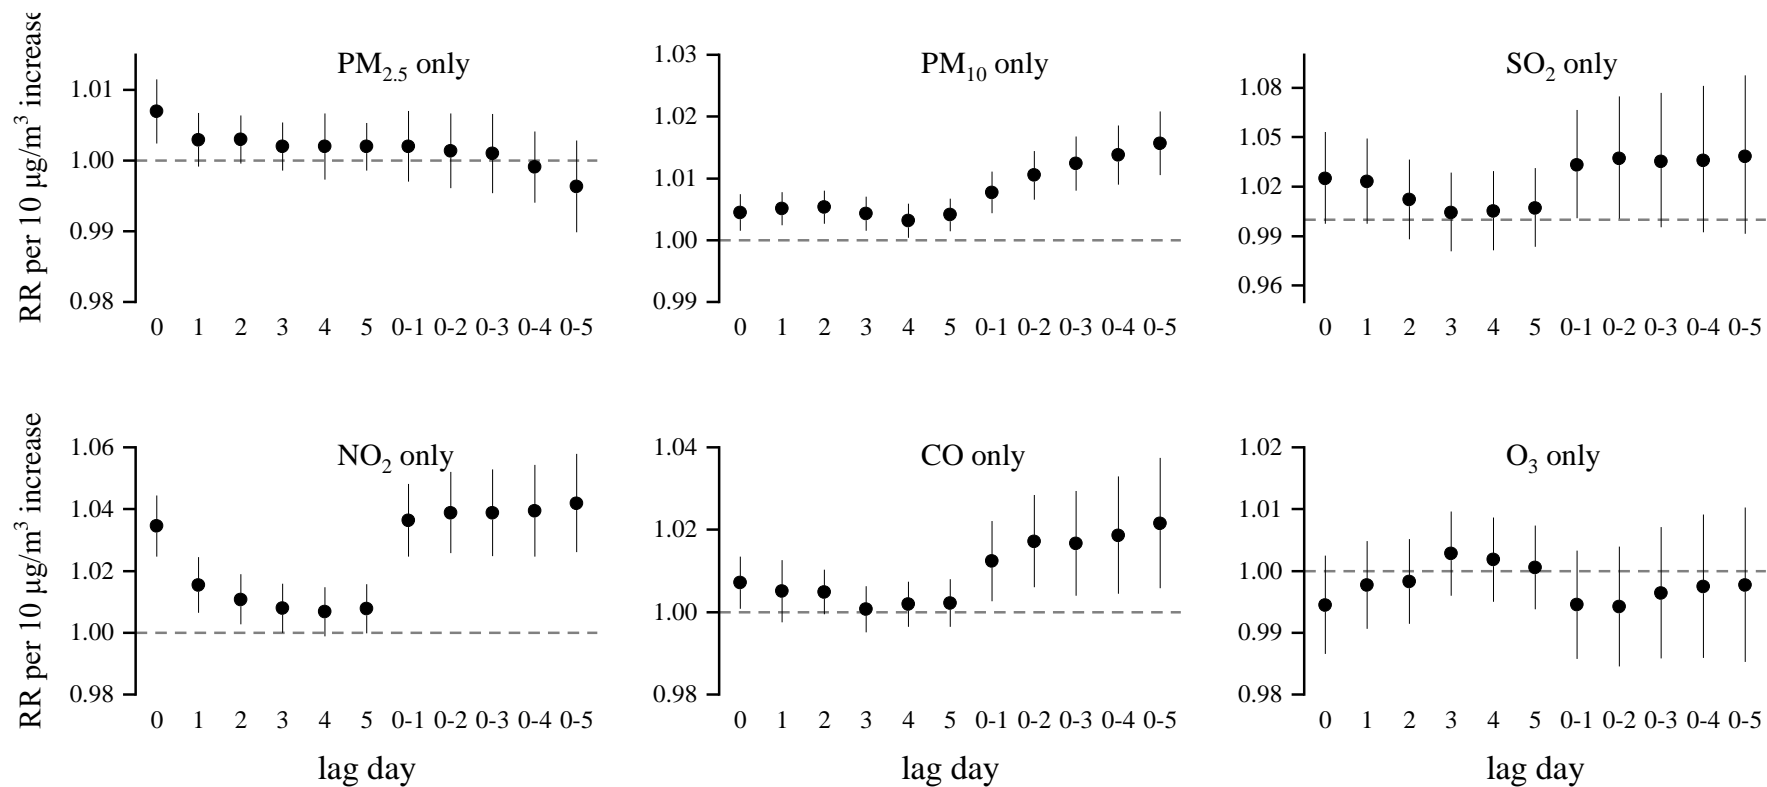

Figure S3 Relative risks (RRs) of outpatient visits for AR associated with a 10 µg/m<sup>3</sup> (CO, 1 mg/m<sup>3</sup>) increase in the air pollutants at different lag days during 2014-2020. The data of air pollutants was obtained from the monitoring station closest to the hospital.

Table S1 AIC values for changing the degrees of freedom of meteorological factors in the model.

| Pollutant models  | Degree of freedom of temperature and relatively humidity | AIC <sup>a</sup> | Pollutant models | Degree of freedom of temperature and relatively humidity | AIC   |
|-------------------|----------------------------------------------------------|------------------|------------------|----------------------------------------------------------|-------|
| PM <sub>2.5</sub> | 3                                                        | 62.17            | NO <sub>2</sub>  | 3                                                        | 61.95 |
|                   | 4                                                        | 63.19            |                  | 4                                                        | 63.0  |
|                   | 5                                                        | 65.13            |                  | 5                                                        | 64.97 |
|                   | 6                                                        | 66.02            |                  | 6                                                        | 65.76 |
|                   | 7                                                        | 66.9             |                  | 7                                                        | 66.61 |
| PM <sub>10</sub>  | 3                                                        | 62.15            | CO               | 3                                                        | 62.13 |
|                   | 4                                                        | 63.16            |                  | 4                                                        | 63.08 |
|                   | 5                                                        | 65.08            |                  | 5                                                        | 64.85 |
|                   | 6                                                        | 65.98            |                  | 6                                                        | 65.76 |
|                   | 7                                                        | 66.87            |                  | 7                                                        | 66.64 |
| SO <sub>2</sub>   | 3                                                        | 62.13            | O <sub>3</sub>   | 3                                                        | 62.18 |
|                   | 4                                                        | 63.14            |                  | 4                                                        | 63.21 |
|                   | 5                                                        | 65.02            |                  | 5                                                        | 65.03 |
|                   | 6                                                        | 65.9             |                  | 6                                                        | 65.96 |
|                   | 7                                                        | 66.77            |                  | 7                                                        | 66.83 |

<sup>a</sup>, Akaike's information criterion (AIC). The model that makes the AIC function smaller is considered to be the better model.

Table S2 Relative risks (RRs) of outpatient visits for AR associated with a 10  $\mu\text{g}/\text{m}^3$  (CO, 1  $\text{mg}/\text{m}^3$ ) increase in the air pollutants at different lag days during 2014-2020

| Pollutant         | Lag day | Per an increase of 10 $\mu\text{g}/\text{m}^3$ |                 | Pollutant       | Lag day | Per an increase of 10 $\mu\text{g}/\text{m}^3$ |               |
|-------------------|---------|------------------------------------------------|-----------------|-----------------|---------|------------------------------------------------|---------------|
|                   |         | RR                                             | 95%CI           |                 |         | RR                                             | 95%CI         |
| PM <sub>2.5</sub> | Lag 0   | 1.008                                          | (1.003-1.012) * | NO <sub>2</sub> | Lag 0   | 1.052                                          | (1.039-1.064) |
|                   | Lag 1   | 1.002                                          | (0.998-1.006)   |                 | Lag 1   | 1.027                                          | (1.015-1.039) |
|                   | Lag 2   | 1.003                                          | (0.999-1.006)   |                 | Lag 2   | 1.013                                          | (1.002-1.023) |
|                   | Lag 3   | 1.000                                          | (0.997-1.004)   |                 | Lag 3   | 1.009                                          | (0.999-1.019) |
|                   | Lag 4   | 0.995                                          | (0.991-0.998)   |                 | Lag 4   | 1.008                                          | (0.998-1.018) |
|                   | Lag 5   | 1.001                                          | (0.995-1.004)   |                 | Lag 5   | 1.009                                          | (0.999-1.019) |
|                   | Lag 01  | 1.006                                          | (1.001-1.012) * |                 | Lag 01  | 1.064                                          | (1.048-1.080) |
|                   | Lag 02  | 1.004                                          | (0.999-1.010)   |                 | Lag 02  | 1.063                                          | (1.046-1.080) |
|                   | Lag 03  | 1.004                                          | (0.998-1.010)   |                 | Lag 03  | 1.060                                          | (1.042-1.078) |
|                   | Lag 04  | 1.004                                          | (0.997-1.010)   |                 | Lag 04  | 1.059                                          | (1.040-1.079) |
| PM <sub>10</sub>  | Lag 05  | 1.003                                          | (0.996-1.010)   | CO              | Lag 05  | 1.063                                          | (1.042-1.084) |
|                   | Lag 0   | 1.004                                          | (1.001-1.007) * |                 | Lag 0   | 1.068                                          | (1.033-1.104) |
|                   | Lag 1   | 1.001                                          | (0.998-1.004)   |                 | Lag 1   | 0.992                                          | (0.963-1.022) |
|                   | Lag 2   | 1.002                                          | (0.999-1.004)   |                 | Lag 2   | 0.978                                          | (0.952-1.005) |
|                   | Lag 3   | 1.000                                          | (0.998-1.003)   |                 | Lag 3   | 0.980                                          | (0.954-1.007) |
|                   | Lag 4   | 0.999                                          | (0.996-1.002)   |                 | Lag 4   | 0.973                                          | (0.947-0.999) |
|                   | Lag 5   | 1.000                                          | (0.998-1.003)   |                 | Lag 5   | 0.992                                          | (0.966-1.019) |
|                   | Lag 01  | 1.004                                          | (1.000-1.007) * |                 | Lag 01  | 1.040                                          | (1.000-1.082) |
|                   | Lag 02  | 1.004                                          | (1.000-1.008) * |                 | Lag 02  | 1.013                                          | (0.970-1.057) |
|                   | Lag 03  | 1.004                                          | (1.000-1.009)   |                 | Lag 03  | 0.995                                          | (0.950-1.043) |
| SO <sub>2</sub>   | Lag 04  | 1.003                                          | (0.999-1.008)   | O <sub>3</sub>  | Lag 04  | 0.975                                          | (0.927-1.026) |
|                   | Lag 05  | 1.004                                          | (0.998-1.009)   |                 | Lag 05  | 0.972                                          | (0.920-1.026) |
|                   | Lag 0   | 1.036                                          | (1.009-1.064) * |                 | Lag 0   | 1.001                                          | (0.995-1.006) |
|                   | Lag 1   | 1.026                                          | (1.000-1.052)   |                 | Lag 1   | 1.003                                          | (0.998-1.008) |
|                   | Lag 2   | 1.007                                          | (0.983-1.031)   |                 | Lag 2   | 1.003                                          | (0.999-1.008) |
|                   | Lag 3   | 0.999                                          | (0.975-1.023)   |                 | Lag 3   | 1.002                                          | (0.998-1.007) |
|                   | Lag 4   | 0.999                                          | (0.975-1.023)   |                 | Lag 4   | 1.002                                          | (0.998-1.007) |
|                   | Lag 5   | 1.002                                          | (0.979-1.026)   |                 | Lag 5   | 1.001                                          | (0.997-1.006) |
|                   | Lag 01  | 1.046                                          | (1.013-1.080) * |                 | Lag 01  | 1.003                                          | (0.997-1.010) |
|                   | Lag 02  | 1.045                                          | (1.008-1.083) * |                 | Lag 02  | 1.005                                          | (0.998-1.012) |
|                   | Lag 03  | 1.039                                          | (0.999-1.082)   |                 | Lag 03  | 1.006                                          | (0.999-1.014) |
|                   | Lag 04  | 1.037                                          | (0.993-1.084)   |                 | Lag 04  | 1.007                                          | (0.999-1.015) |
|                   | Lag 05  | 1.039                                          | (0.990-1.090)   |                 | Lag 05  | 1.008                                          | (0.999-1.016) |

\*  $P$  value < 0.05

Table S3 Relative risks (RRs) of outpatient visits for AR associated with a 10  $\mu\text{g}/\text{m}^3$  ( $\text{CO}$ , 1  $\text{mg}/\text{m}^3$ ) increase in the air pollutants through the original model and the model plus demographic factors.

| Pollutant         | Lag day | Original model | +offset (population) | Pollutant       | Lag day | Original model | +offset (population) |
|-------------------|---------|----------------|----------------------|-----------------|---------|----------------|----------------------|
| PM <sub>2.5</sub> | Lag 0   | <b>1.008 *</b> | <b>1.007 *</b>       | NO <sub>2</sub> | Lag 0   | <b>1.052 *</b> | <b>1.053 *</b>       |
|                   | Lag 1   | 1.002          | 1.002                |                 | Lag 1   | <b>1.027 *</b> | <b>1.026 *</b>       |
|                   | Lag 2   | 1.003          | 1.002                |                 | Lag 2   | 1.013          | <b>1.012 *</b>       |
|                   | Lag 3   | 1.000          | 1.001                |                 | Lag 3   | 1.009          | 1.009                |
|                   | Lag 4   | 0.995          | 0.995                |                 | Lag 4   | 1.008          | 1.008                |
|                   | Lag 5   | 0.998          | 0.996                |                 | Lag 5   | 1.009          | 1.009                |
|                   | Lag 01  | <b>1.001 *</b> | <b>1.001 *</b>       |                 | Lag 01  | <b>1.064 *</b> | <b>1.064 *</b>       |
|                   | Lag 02  | 1.004          | 1.004                |                 | Lag 02  | <b>1.063 *</b> | <b>1.063 *</b>       |
|                   | Lag 03  | 1.004          | 1.003                |                 | Lag 03  | <b>1.060 *</b> | <b>1.060 *</b>       |
|                   | Lag 04  | 1.004          | 1.004                |                 | Lag 04  | <b>1.059 *</b> | <b>1.060 *</b>       |
| PM <sub>10</sub>  | Lag 05  | 1.003          | 1.003                | CO              | Lag 05  | <b>1.063 *</b> | <b>1.064 *</b>       |
|                   | Lag 0   | <b>1.004 *</b> | <b>1.004</b>         |                 | Lag 0   | <b>1.068 *</b> | <b>1.066</b>         |
|                   | Lag 1   | 1.001          | 1.001                |                 | Lag 1   | 0.992          | 0.989                |
|                   | Lag 2   | 1.002          | 1.002                |                 | Lag 2   | 0.978          | 0.978                |
|                   | Lag 3   | 1.000          | 1.001                |                 | Lag 3   | 0.980          | 0.982                |
|                   | Lag 4   | 0.999          | 1.000                |                 | Lag 4   | 0.973          | 0.977                |
|                   | Lag 5   | 1.000          | 1.001                |                 | Lag 5   | 0.992          | 0.995                |
|                   | Lag 01  | <b>1.004 *</b> | 1.003                |                 | Lag 01  | 1.040          | 1.036                |
|                   | Lag 02  | <b>1.004 *</b> | <b>1.004</b>         |                 | Lag 02  | 1.013          | 1.009                |
|                   | Lag 03  | 1.004          | 1.004                |                 | Lag 03  | 0.995          | 0.993                |
| SO <sub>2</sub>   | Lag 04  | 1.003          | 1.004                | O <sub>3</sub>  | Lag 04  | 0.975          | 0.976                |
|                   | Lag 05  | 1.004          | 1.004                |                 | Lag 05  | 0.972          | 0.975                |
|                   | Lag 0   | <b>1.036 *</b> | <b>1.036</b>         |                 | Lag 0   | 1.001          | 1.001                |
|                   | Lag 1   | <b>1.026 *</b> | 1.020                |                 | Lag 1   | 1.003          | 1.003                |
|                   | Lag 2   | 1.007          | 1.006                |                 | Lag 2   | 1.003          | 1.004                |
|                   | Lag 3   | 0.999          | 0.999                |                 | Lag 3   | 1.002          | 1.003                |
|                   | Lag 4   | 0.999          | 0.999                |                 | Lag 4   | 1.002          | 1.003                |
|                   | Lag 5   | 1.002          | 1.004                |                 | Lag 5   | 1.001          | 1.002                |
|                   | Lag 01  | <b>1.046 *</b> | <b>1.041</b>         |                 | Lag 01  | 1.003          | 1.003                |
|                   | Lag 02  | <b>1.045 *</b> | <b>1.041</b>         |                 | Lag 02  | 1.005          | 1.006                |
|                   | Lag 03  | 1.039          | 1.036                |                 | Lag 03  | 1.006          | 1.007                |
|                   | Lag 04  | 1.037          | 1.034                |                 | Lag 04  | 1.007          | 1.008                |
|                   | Lag 05  | 1.039          | 1.037                |                 | Lag 05  | 1.008          | 1.009                |

\*  $P$  value < 0.05

Table S4 Relative risks (RRs) of outpatient visits for AR associated with a 10  $\mu\text{g}/\text{m}^3$  ( $\text{CO}$ , 1  $\text{mg}/\text{m}^3$ ) increase in the air pollutants through the original model and the model plus the season and three-day moving average temperature.

| Pollutant         | Lag day | Original model | +season        | +season+3-day moving average temperature |
|-------------------|---------|----------------|----------------|------------------------------------------|
| PM <sub>2.5</sub> | Lag 0   | <b>1.008</b> * | <b>1.007</b> * | <b>1.009</b> *                           |
|                   | Lag 1   | 1.002          | 1.002          | 1.001                                    |
|                   | Lag 2   | 1.003          | 1.003          | 1.002                                    |
|                   | Lag 3   | 1.000          | 1.001          | 1.002                                    |
|                   | Lag 4   | 0.995          | 0.995          | 0.994                                    |
|                   | Lag 5   | 0.998          | 0.998          | 0.997                                    |
|                   | Lag 01  | <b>1.001</b> * | <b>1.000</b> * | <b>1.001</b> *                           |
|                   | Lag 02  | 1.004          | 1.003          | 1.003                                    |
|                   | Lag 03  | 1.004          | 1.004          | 1.004                                    |
|                   | Lag 04  | 1.004          | 1.004          | 1.004                                    |
|                   | Lag 05  | 1.003          | 1.003          | 1.003                                    |
| PM <sub>10</sub>  | Lag 0   | <b>1.004</b> * | <b>1.003</b> * | <b>1.003</b> *                           |
|                   | Lag 1   | 1.001          | 1.001          | 0.999                                    |
|                   | Lag 2   | 1.002          | 1.002          | 0.998                                    |
|                   | Lag 3   | 1.000          | 1.001          | 0.998                                    |
|                   | Lag 4   | 0.999          | 1.000          | 0.999                                    |
|                   | Lag 5   | 1.000          | 1.001          | 1.001                                    |
|                   | Lag 01  | <b>1.004</b> * | 1.003          | 1.002                                    |
|                   | Lag 02  | <b>1.004</b> * | 1.004          | 1.000                                    |
|                   | Lag 03  | 1.004          | 1.004          | 0.998                                    |
|                   | Lag 04  | 1.003          | 1.003          | 0.997                                    |
|                   | Lag 05  | 1.004          | 1.004          | 0.998                                    |
| SO <sub>2</sub>   | Lag 0   | <b>1.036</b> * | <b>1.032</b> * | <b>1.031</b> *                           |
|                   | Lag 1   | <b>1.026</b> * | 1.020          | 1.022                                    |
|                   | Lag 2   | 1.007          | 1.009          | 0.996                                    |
|                   | Lag 3   | 0.999          | 1.001          | 0.987                                    |
|                   | Lag 4   | 0.999          | 1.002          | 0.995                                    |
|                   | Lag 5   | 1.002          | 1.006          | 1.005                                    |
|                   | Lag 01  | <b>1.046</b> * | <b>1.039</b> * | <b>1.040</b> *                           |
|                   | Lag 02  | <b>1.045</b> * | <b>1.041</b> * | 1.031                                    |
|                   | Lag 03  | 1.039          | 1.037          | 1.018                                    |
|                   | Lag 04  | 1.037          | 1.038          | 1.014                                    |
|                   | Lag 05  | 1.039          | 1.042          | 1.018                                    |
| NO <sub>2</sub>   | Lag 0   | <b>1.052</b> * | <b>1.051</b> * | <b>1.058</b> *                           |
|                   | Lag 1   | <b>1.027</b> * | <b>1.025</b> * | <b>1.029</b> *                           |
|                   | Lag 2   | 1.013          | <b>1.012</b> * | 1.002                                    |
|                   | Lag 3   | 1.009          | 1.008          | 0.994                                    |
|                   | Lag 4   | 1.008          | 1.007          | 1.000                                    |
|                   | Lag 5   | 1.009          | 1.009          | 1.005                                    |
|                   | Lag 01  | <b>1.064</b> * | <b>1.062</b> * | <b>1.071</b> *                           |
|                   | Lag 02  | <b>1.063</b> * | <b>1.061</b> * | <b>1.057</b> *                           |
|                   | Lag 03  | <b>1.060</b> * | <b>1.058</b> * | <b>1.045</b> *                           |
|                   | Lag 04  | <b>1.059</b> * | <b>1.057</b> * | <b>1.040</b> *                           |

| Pollutant      | Lag day | Original model | +season        | +season+3-day moving<br>average temperature |
|----------------|---------|----------------|----------------|---------------------------------------------|
| CO             | Lag 05  | <b>1.063</b> * | <b>1.060</b> * | <b>1.043</b> *                              |
|                | Lag 0   | <b>1.068</b> * | <b>1.059</b> * | <b>1.069</b> *                              |
|                | Lag 1   | 0.992          | 0.989          | 0.994                                       |
|                | Lag 2   | 0.978          | 0.979          | 0.963                                       |
|                | Lag 3   | 0.980          | 0.981          | 0.962                                       |
|                | Lag 4   | 0.973          | 0.975          | 0.966                                       |
|                | Lag 5   | 0.992          | 0.995          | 0.993                                       |
|                | Lag 01  | 1.040          | 1.032          | <b>1.043</b> *                              |
|                | Lag 02  | 1.013          | 1.007          | 1.001                                       |
|                | Lag 03  | 0.995          | 0.991          | 0.972                                       |
|                | Lag 04  | 0.975          | 0.972          | 0.949                                       |
|                | Lag 05  | 0.972          | 0.971          | 0.947                                       |
| O <sub>3</sub> | Lag 0   | 1.001          | 1.001          | 1.002                                       |
|                | Lag 1   | 1.003          | 1.003          | 0.996                                       |
|                | Lag 2   | 1.003          | 1.004          | 0.995                                       |
|                | Lag 3   | 1.002          | 1.002          | 0.998                                       |
|                | Lag 4   | 1.002          | 1.002          | 1.000                                       |
|                | Lag 5   | 1.001          | 1.002          | 1.001                                       |
|                | Lag 01  | 1.003          | 1.003          | 0.999                                       |
|                | Lag 02  | 1.005          | 1.005          | 0.995                                       |
|                | Lag 03  | 1.006          | 1.006          | 0.994                                       |
|                | Lag 04  | 1.007          | 1.007          | 0.994                                       |
|                | Lag 05  | 1.008          | 1.008          | 0.995                                       |

\*  $P$  value < 0.05



Table S5 Relative risks (RRs) of outpatient visits for AR associated with an IQR increase in the air pollutants at lag0 in single-pollutant models and two-pollutant models.

| Two-pollutant models |                    | Total |              | Two-pollutant models |                    | Total |              |
|----------------------|--------------------|-------|--------------|----------------------|--------------------|-------|--------------|
|                      |                    | RR    | 95%CI        |                      |                    | RR    | 95%CI        |
| PM <sub>2.5</sub>    | -                  | 1.042 | 1.016-1.069* | NO <sub>2</sub>      | -                  | 1.167 | 1.125-1.211* |
|                      | +NO <sub>2</sub>   | 0.954 | 0.922-1.002  |                      | +PM <sub>2.5</sub> | 1.194 | 1.146-1.244* |
|                      | +SO <sub>2</sub>   | 1.034 | 1.003-1.065* |                      | +SO <sub>2</sub>   | 1.174 | 1.046-1.076* |
|                      | +CO                | 1.021 | 0.990-1.053  |                      | +CO                | 1.152 | 1.110-1.196* |
|                      | +O <sub>3</sub>    | 1.043 | 1.017-1.069* |                      | +O <sub>3</sub>    | 1.135 | 1.102-1.169* |
| PM <sub>10</sub>     | -                  | 1.028 | 1.007-1.050* | CO                   | -                  | 1.033 | 1.016-1.050* |
|                      | +SO <sub>2</sub>   | 1.020 | 0.997-1.044  |                      | +PM <sub>2.5</sub> | 1.025 | 1.005-1.045* |
|                      | +NO <sub>2</sub>   | 0.983 | 0.959-1.008  |                      | +SO <sub>2</sub>   | 1.028 | 1.009-1.048* |
|                      | +CO                | 1.014 | 0.991-1.038  |                      | +NO <sub>2</sub>   | 0.981 | 0.961-1.002  |
|                      | +O <sub>3</sub>    | 1.028 | 1.007-1.050* |                      | +O <sub>3</sub>    | 1.033 | 1.017-1.051* |
| SO <sub>2</sub>      | -                  | 1.027 | 1.008-1.047* | O <sub>3</sub>       | -                  | 1.005 | 0.965-1.047  |
|                      | +PM <sub>2.5</sub> | 1.012 | 0.991-1.035  |                      | +PM <sub>2.5</sub> | 1.001 | 0.955-1.050  |
|                      | +NO <sub>2</sub>   | 0.980 | 0.961-1.002  |                      | +SO <sub>2</sub>   | 1.012 | 0.965-1.060  |
|                      | +CO                | 1.008 | 0.991-1.027  |                      | +NO <sub>2</sub>   | 1.025 | 0.978-1.073  |
|                      | +O <sub>3</sub>    | 1.021 | 1.005-1.038* |                      | +CO                | 1.013 | 0.966-1.061  |

\*  $P$  value < 0.05

Table S6 Relative risks (RRs) of outpatient visits for AR for IQR increase of SO<sub>2</sub> and NO<sub>2</sub> at lag01, and PM<sub>10</sub> at lag02 during specific periods.

| Lag day               | Pollutant        | Entire period          | Period 1               | Period 2               | Period 3               | <i>P</i> value |
|-----------------------|------------------|------------------------|------------------------|------------------------|------------------------|----------------|
| At lag01 <sup>a</sup> | SO <sub>2</sub>  | 1.027 (1.008, 1.047) * | 1.263 (1.052, 1.517) * | 1.041 (0.733, 1.477)   | 2.374 (1.068, 5.278) * | 0.99421        |
|                       | NO <sub>2</sub>  | 1.167 (1.125, 1.211) * | 1.180 (1.043, 1.334) * | 1.330 (1.159, 1.527) * | 1.768 (1.512, 2.067) * | 0.01409        |
| At lag02 <sup>b</sup> | PM <sub>10</sub> | 1.031 (1.002, 1.061) * | 1.041 (1.001, 1.082) * | 0.999 (0.960, 1.039)   | 1.008 (0.972, 1.044)   | 0.75829        |

<sup>a</sup>, the largest effect estimates of SO<sub>2</sub> and NO<sub>2</sub> occurred at lag 01; <sup>b</sup>, the largest effect estimates of PM<sub>10</sub> occurred at lag 02.

\* *P* value < 0.05
